# Supplementary material for: A Facile Ionic Liquid Promoted Synthesis, Cholinesterase Inhibitory Activity and Molecular Modeling Study of Novel Highly Functionalized Spiropyrrolidines
Source: PubMed Central journal article supplement (PMC6272427; doi:10.3390/molecules20022296), 2015-01-29
Supplement: molecules-20-02296-s001.pdf [file molecules-20-02296-s001.pdf]

# Supplementary Materials

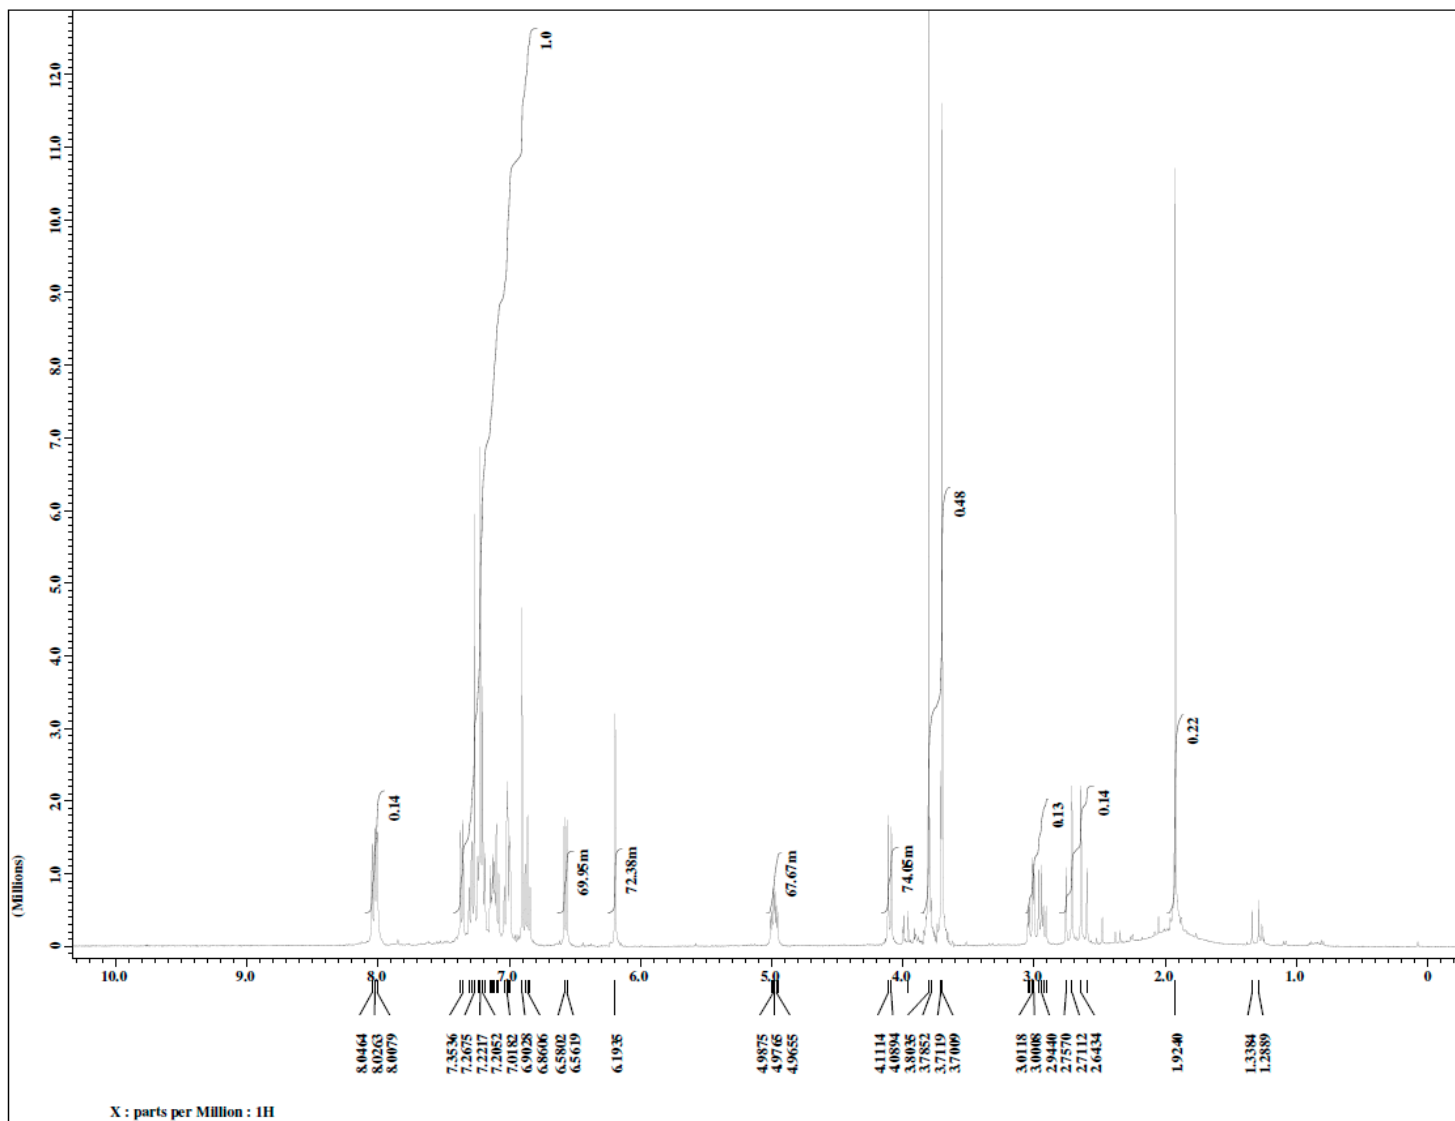

Figure S1.  $^1\text{H-NMR}$  spectrum of **4b**.

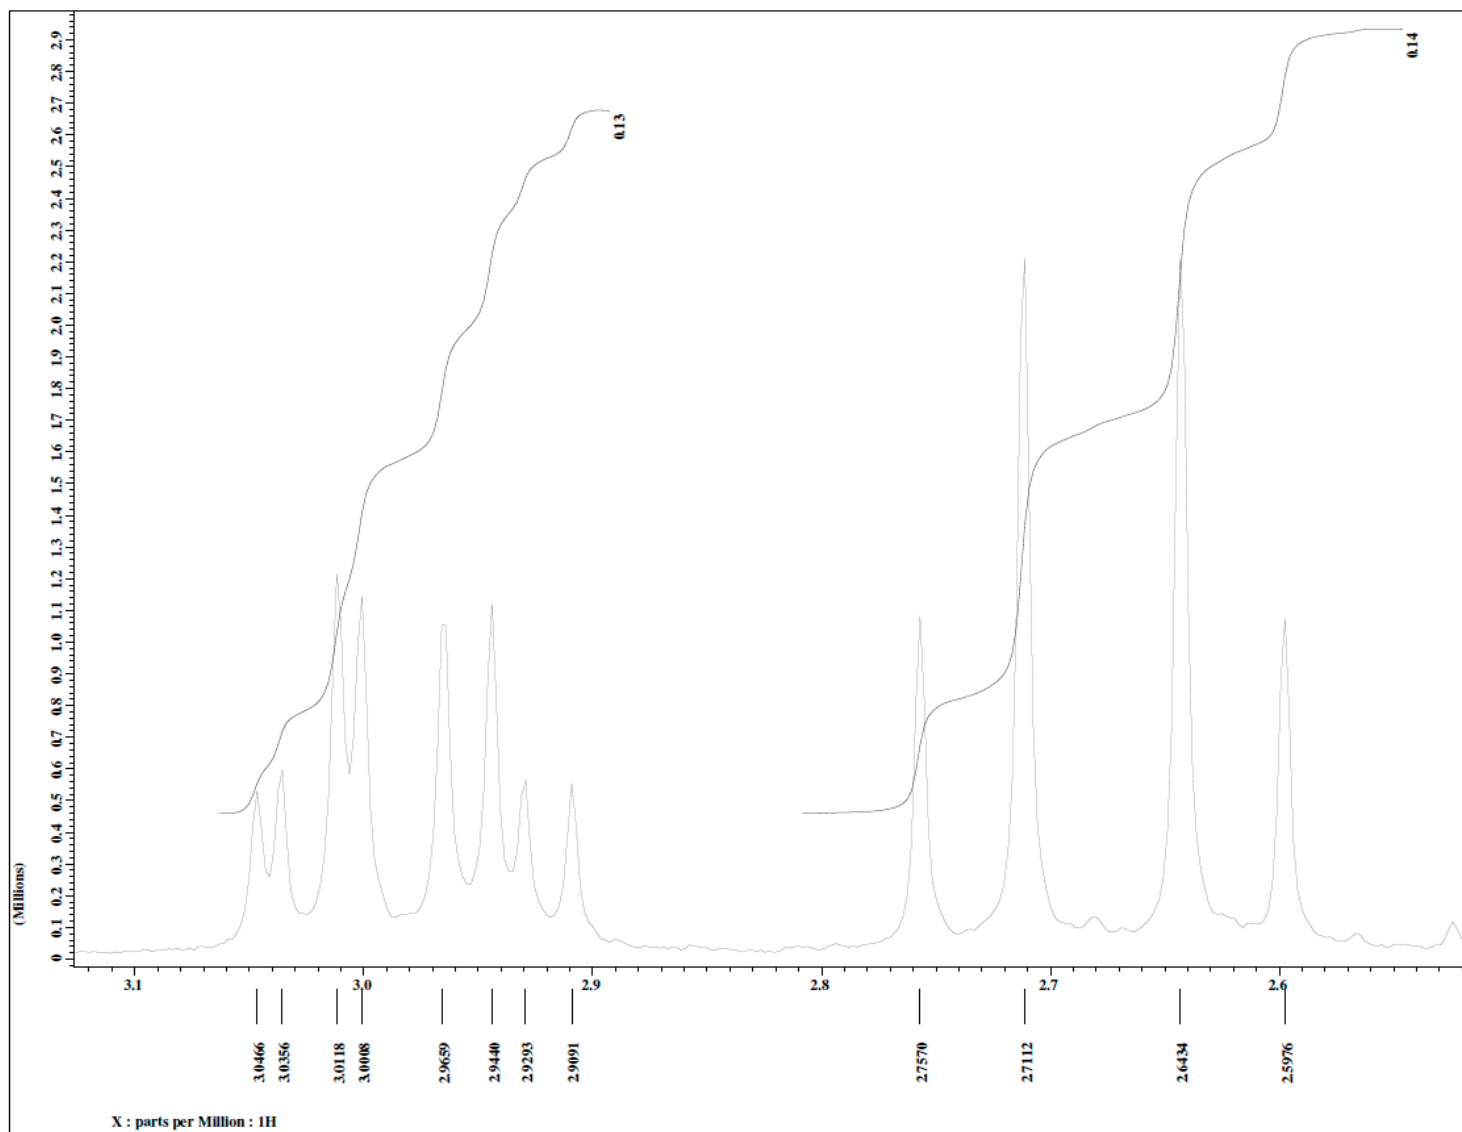

Figure S2.  $^1\text{H-NMR}$  spectrum of **4b** (Expansion).

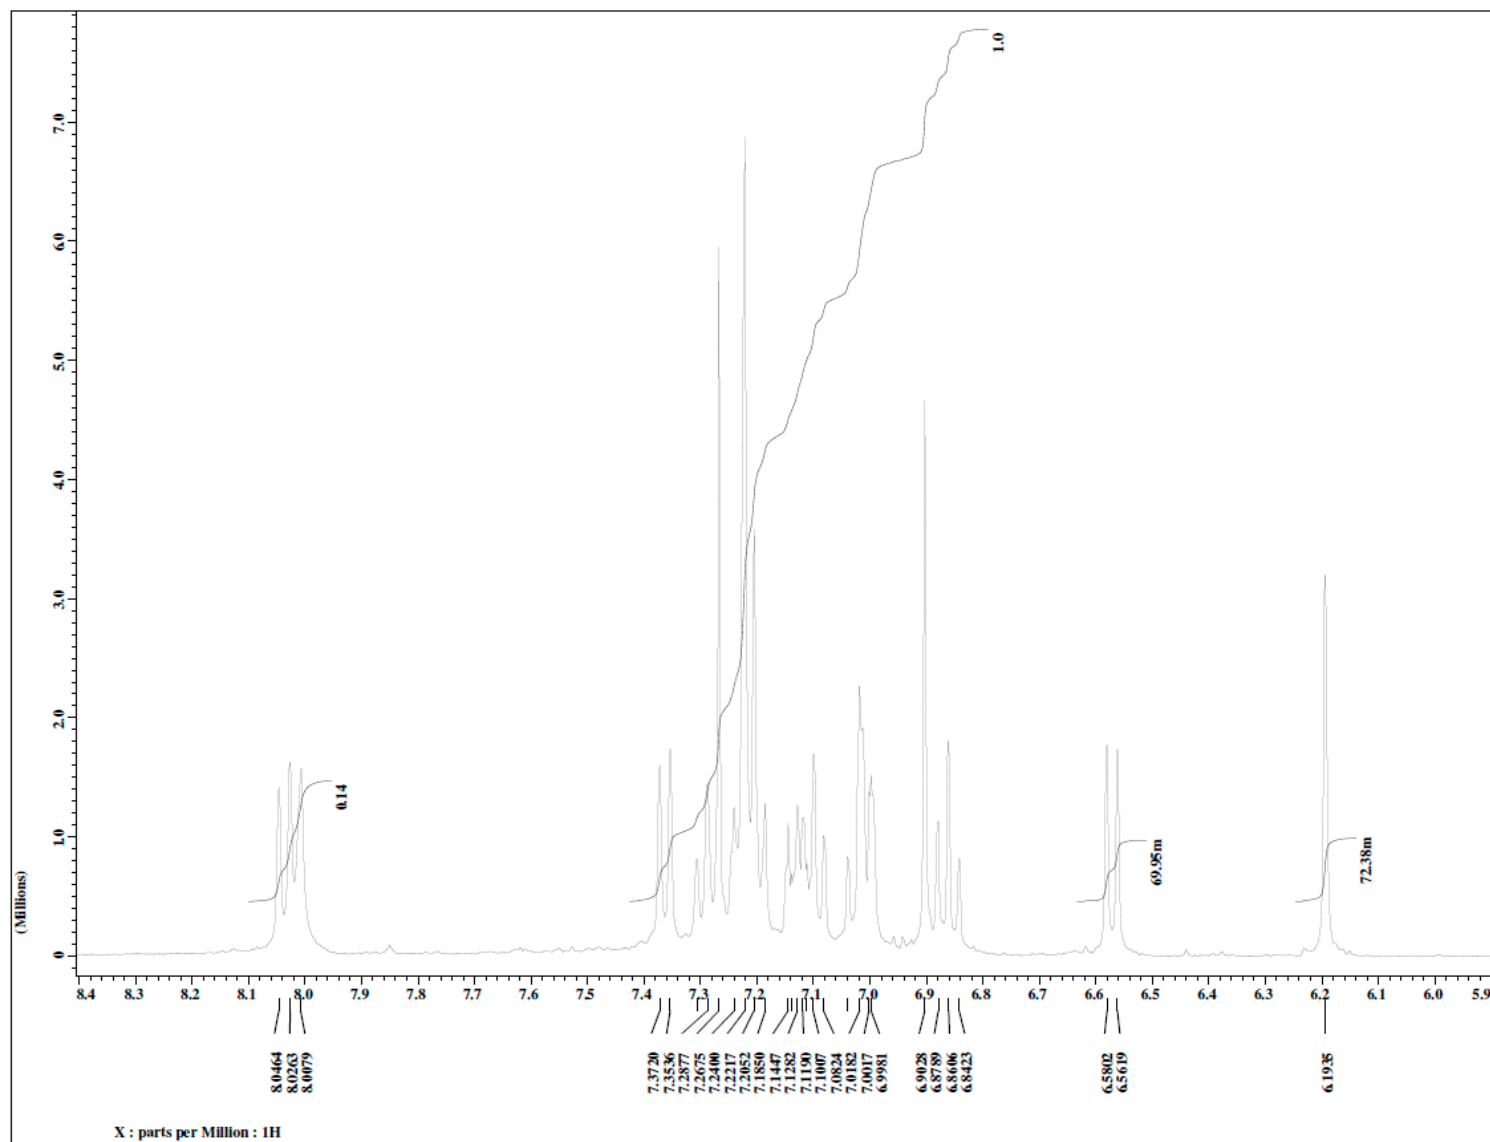

Figure S3.  $^1\text{H}$ -NMR spectrum of **4b** (Expansion).

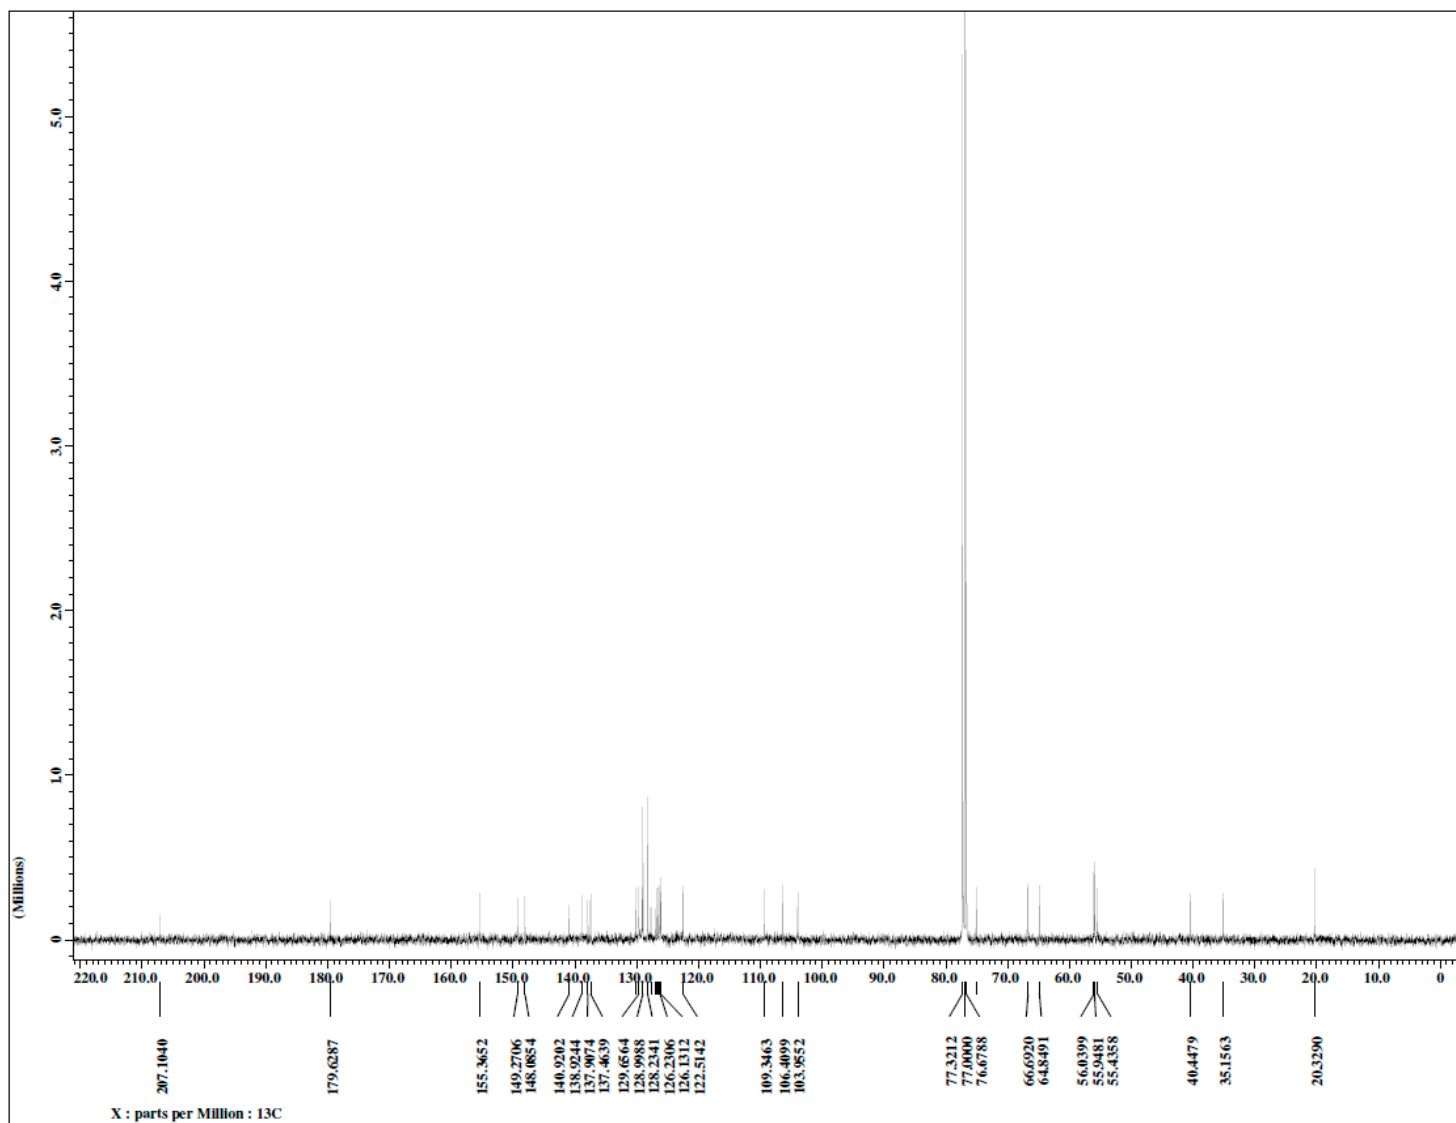

Figure S4.  $^{13}\text{C}$ -NMR spectrum of **4b**.

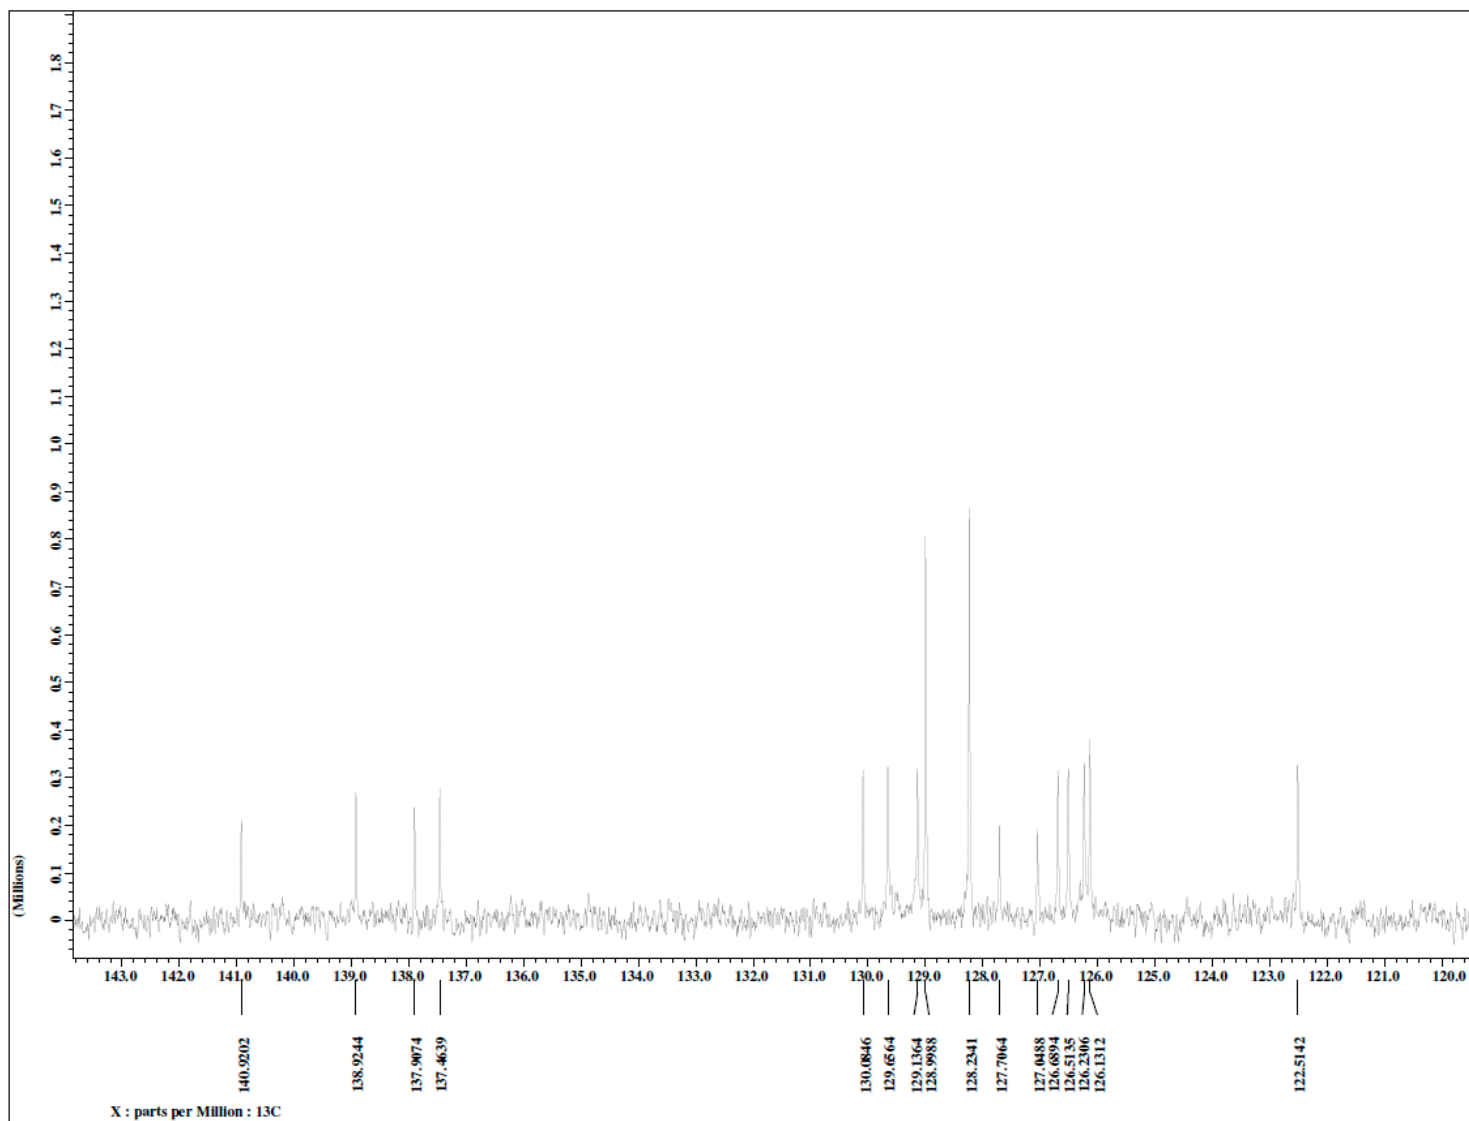

Figure S5.  $^{13}\text{C}$ -NMR spectrum of **4b** (Expansion).

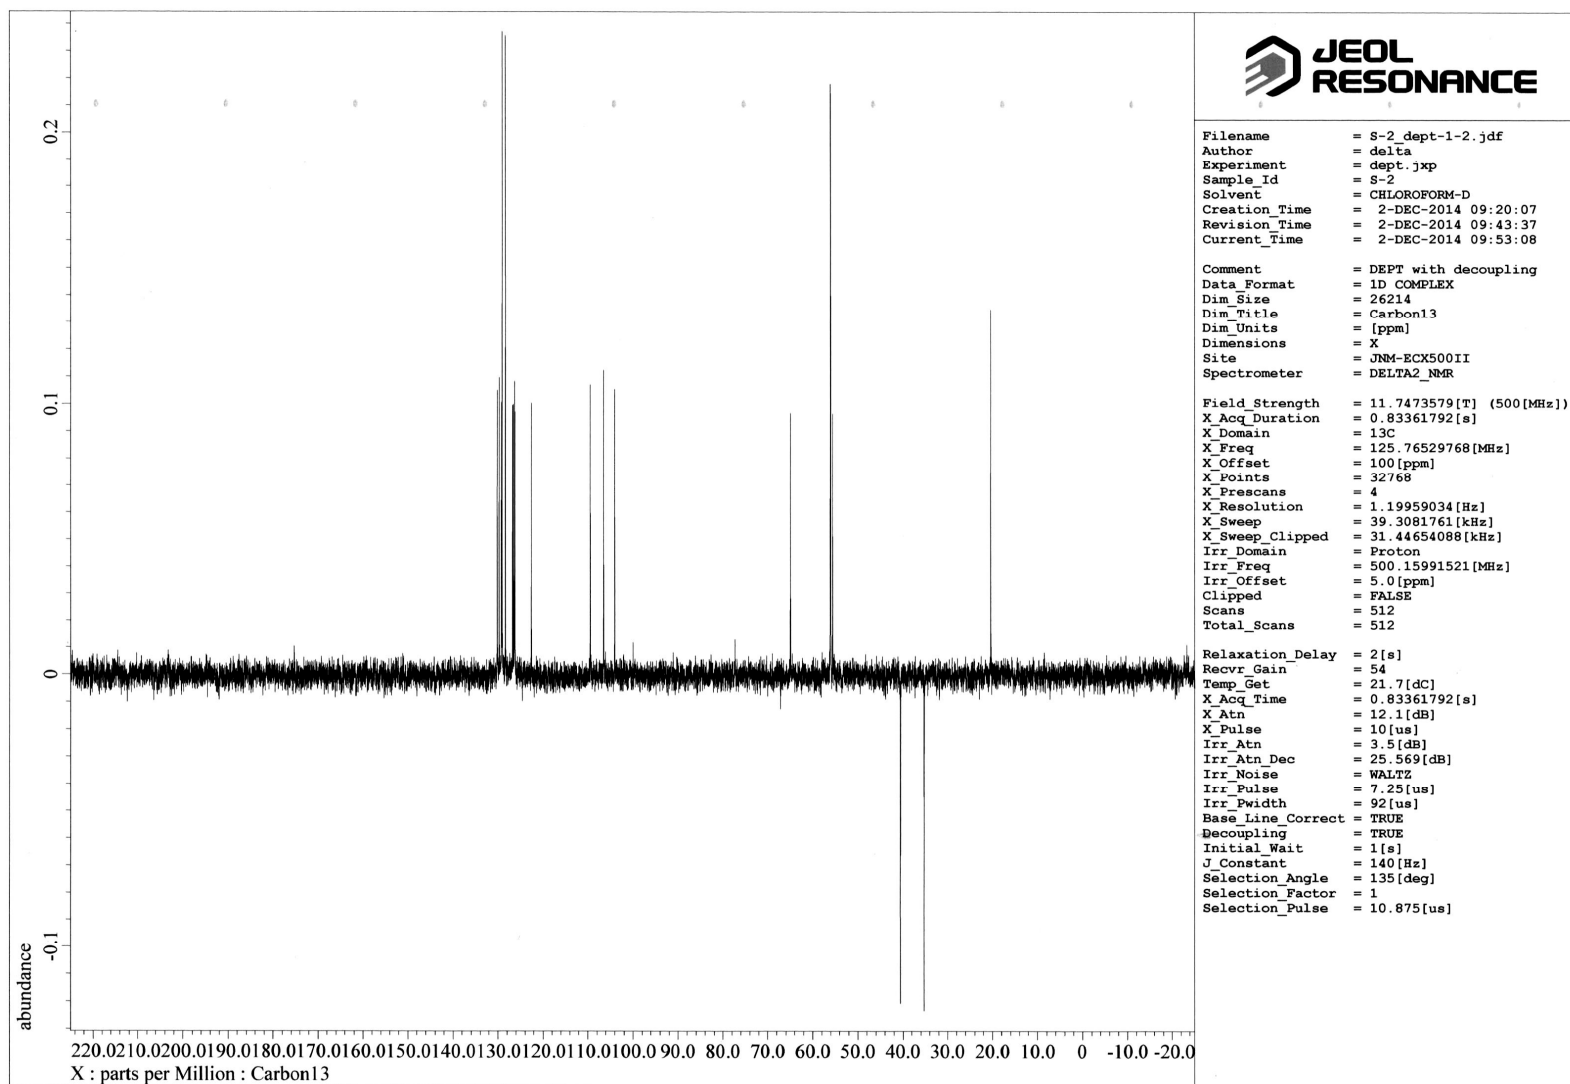

Figure S6. DEPT 135 NMR spectrum of **4b**.

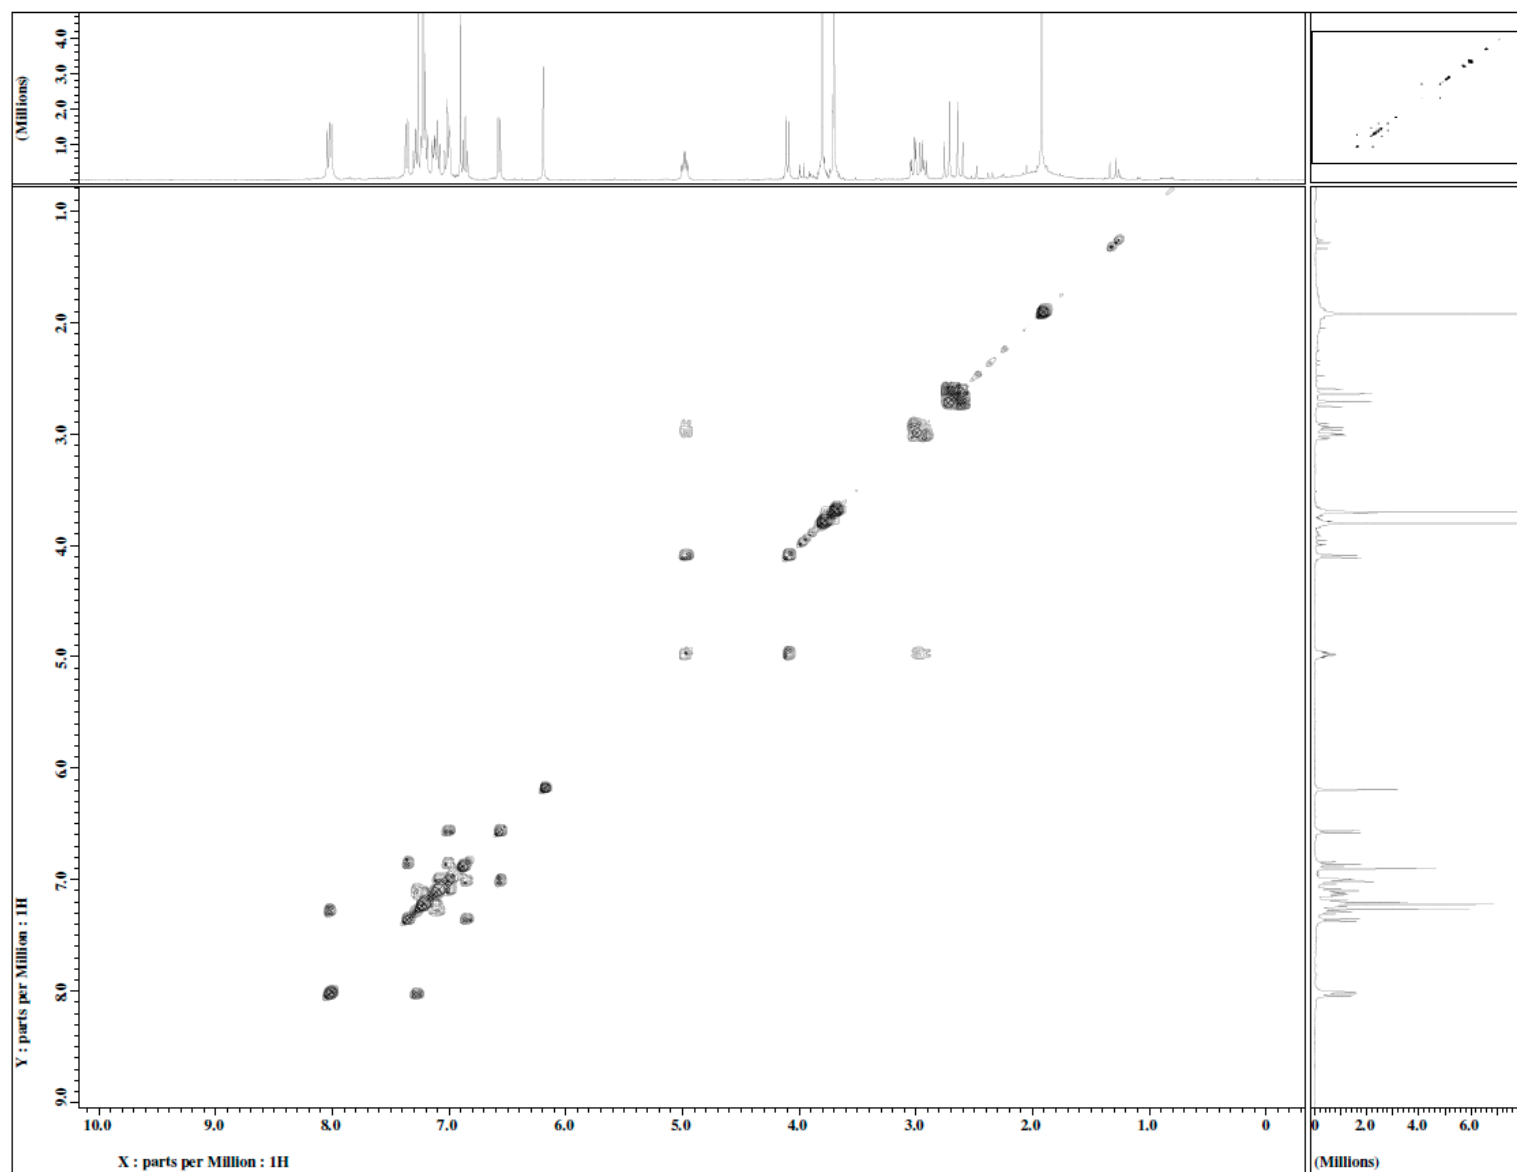

Figure S7. H,H-COSY NMR spectrum of 4b.

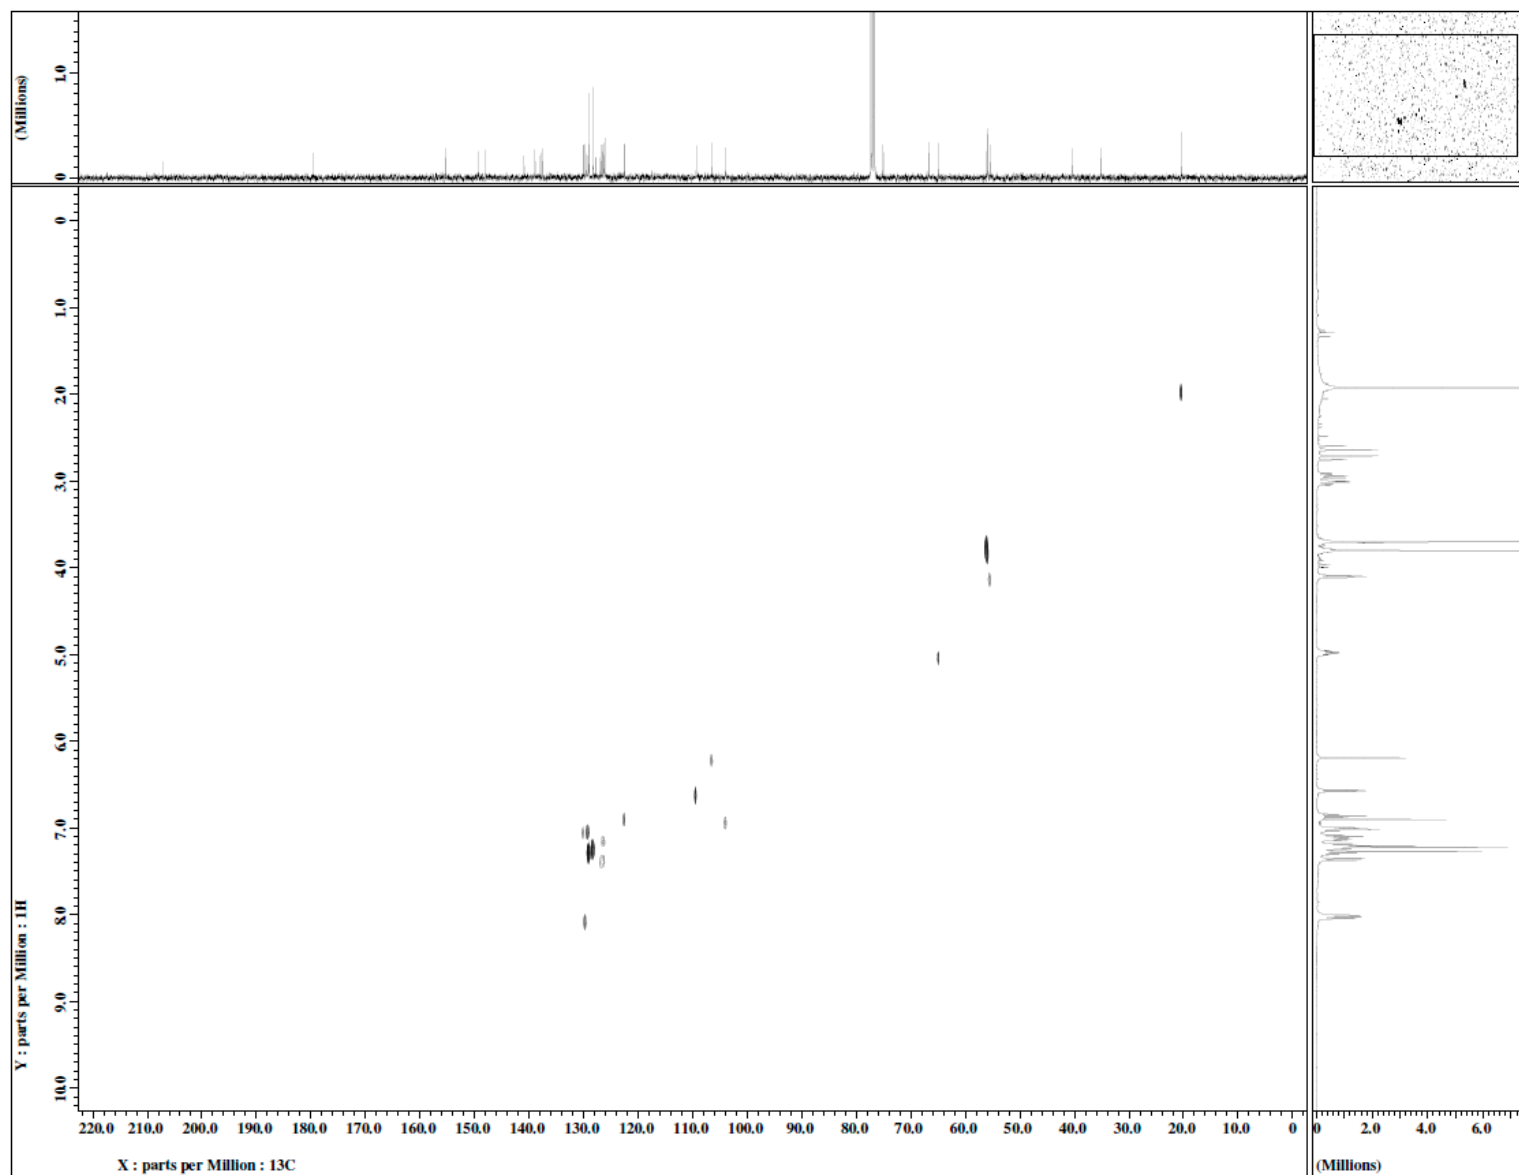

Figure S8. C,H-COSY NMR spectrum of 4b.



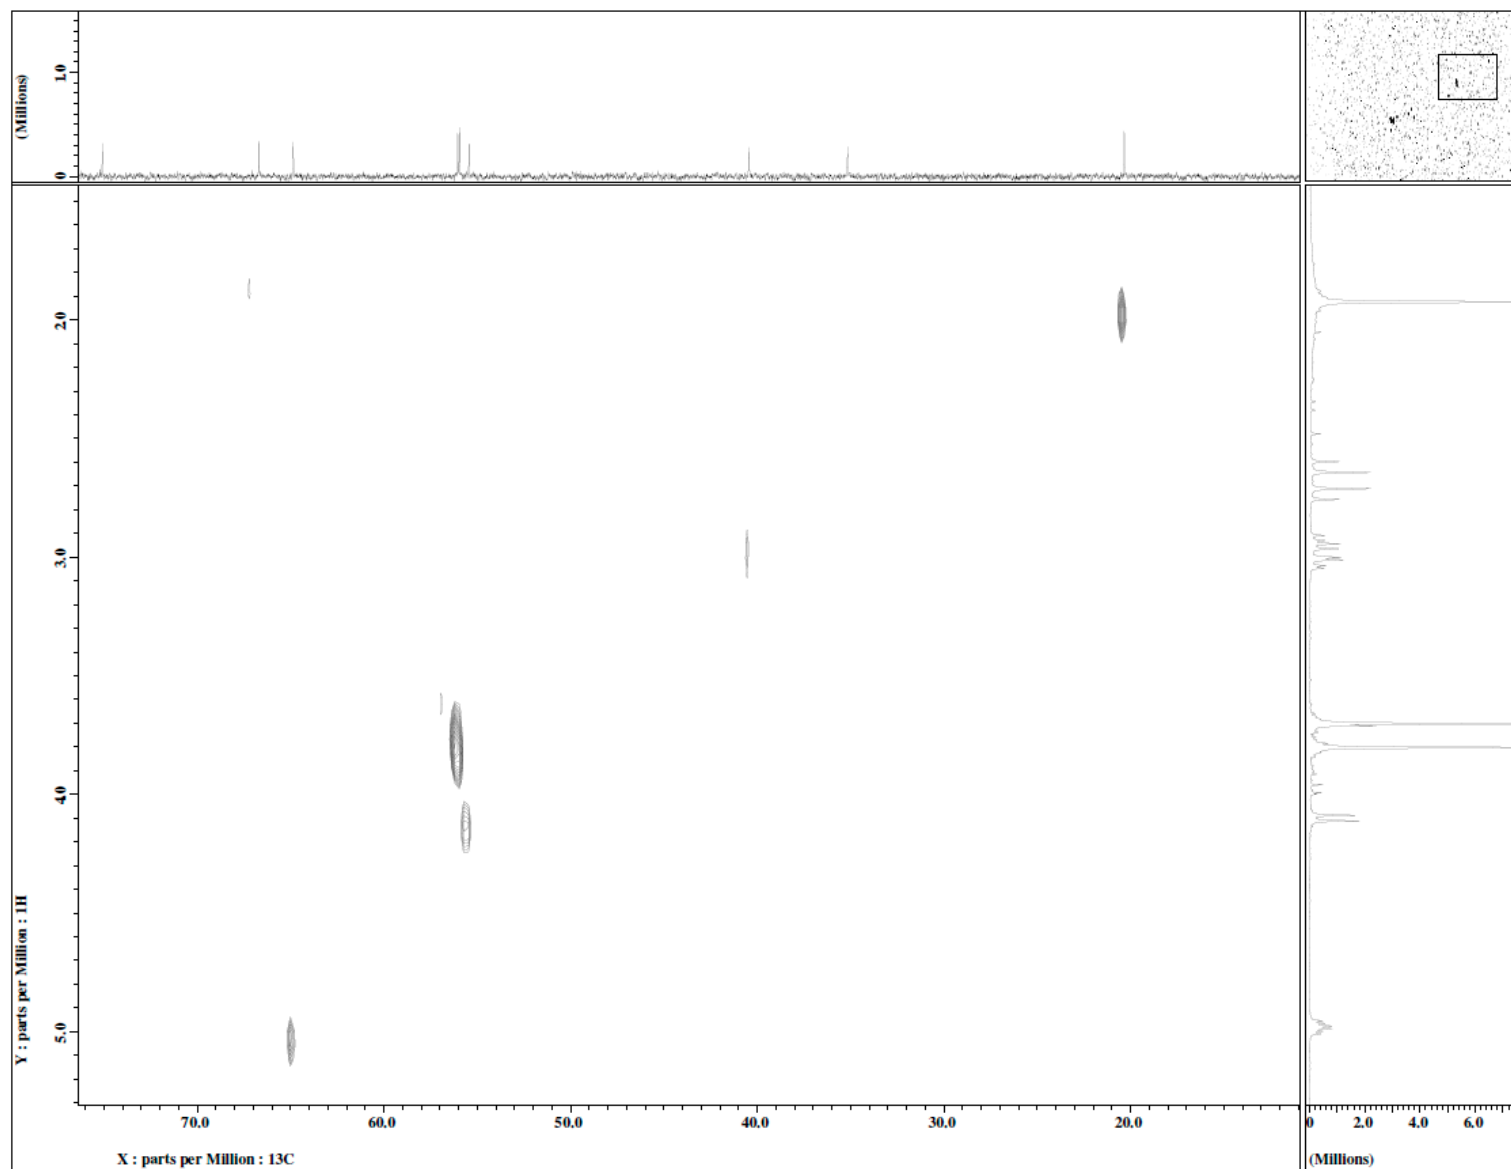

Figure S9. C,H-COSY NMR spectrum of **4b** (Expansion).

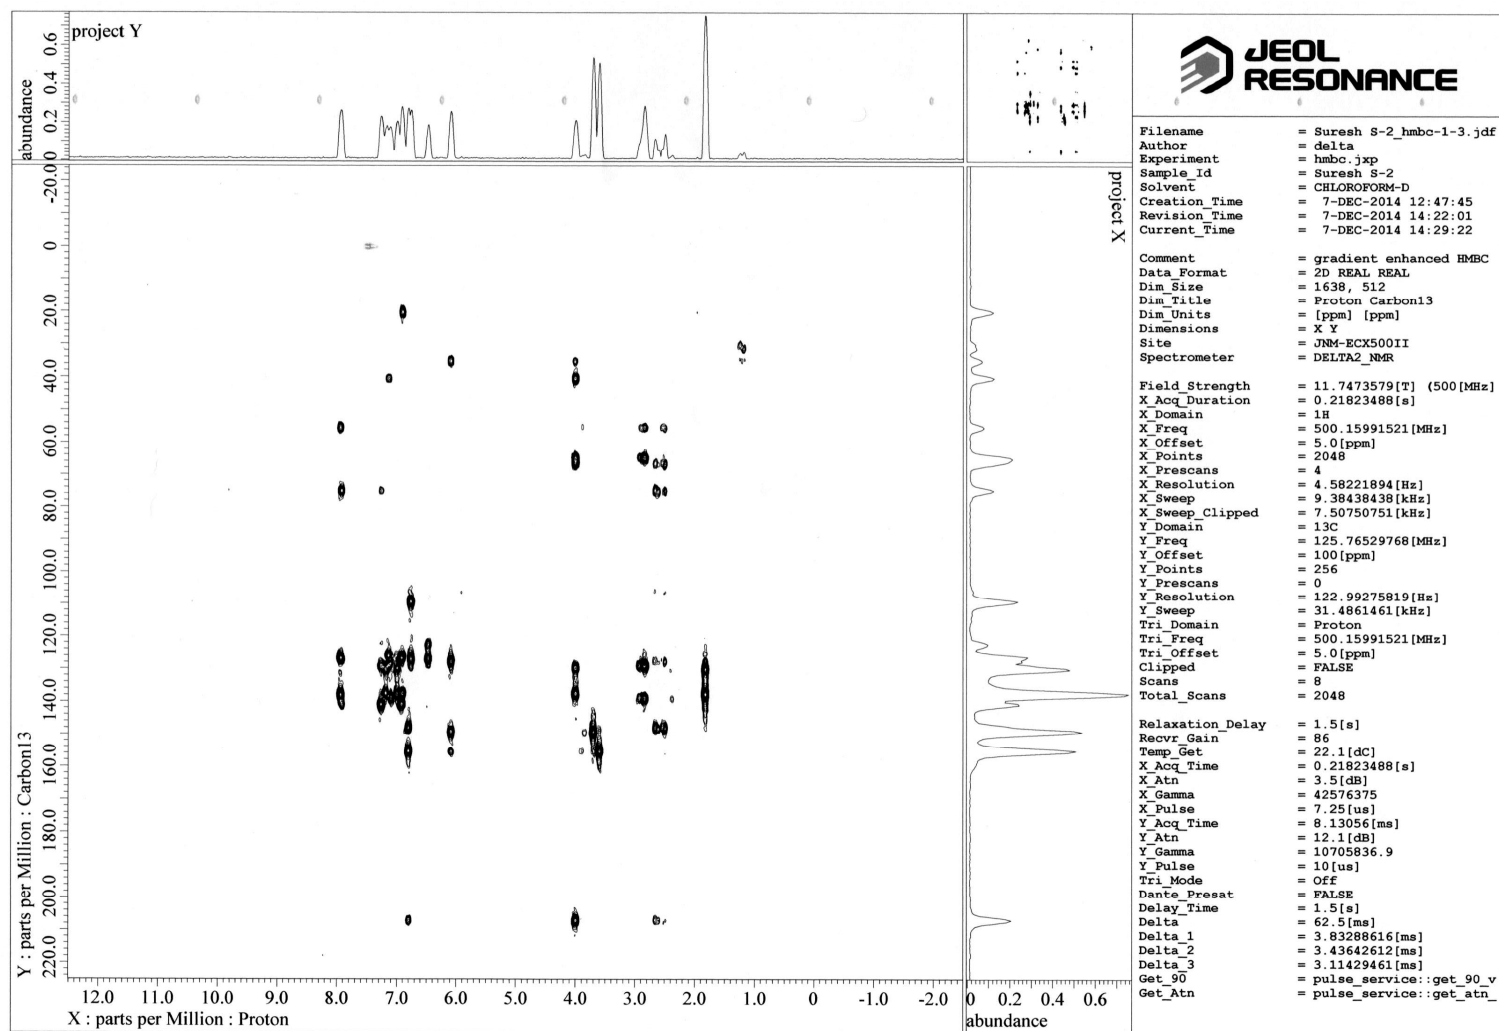

Figure S10. HMBC spectrum of 4b.

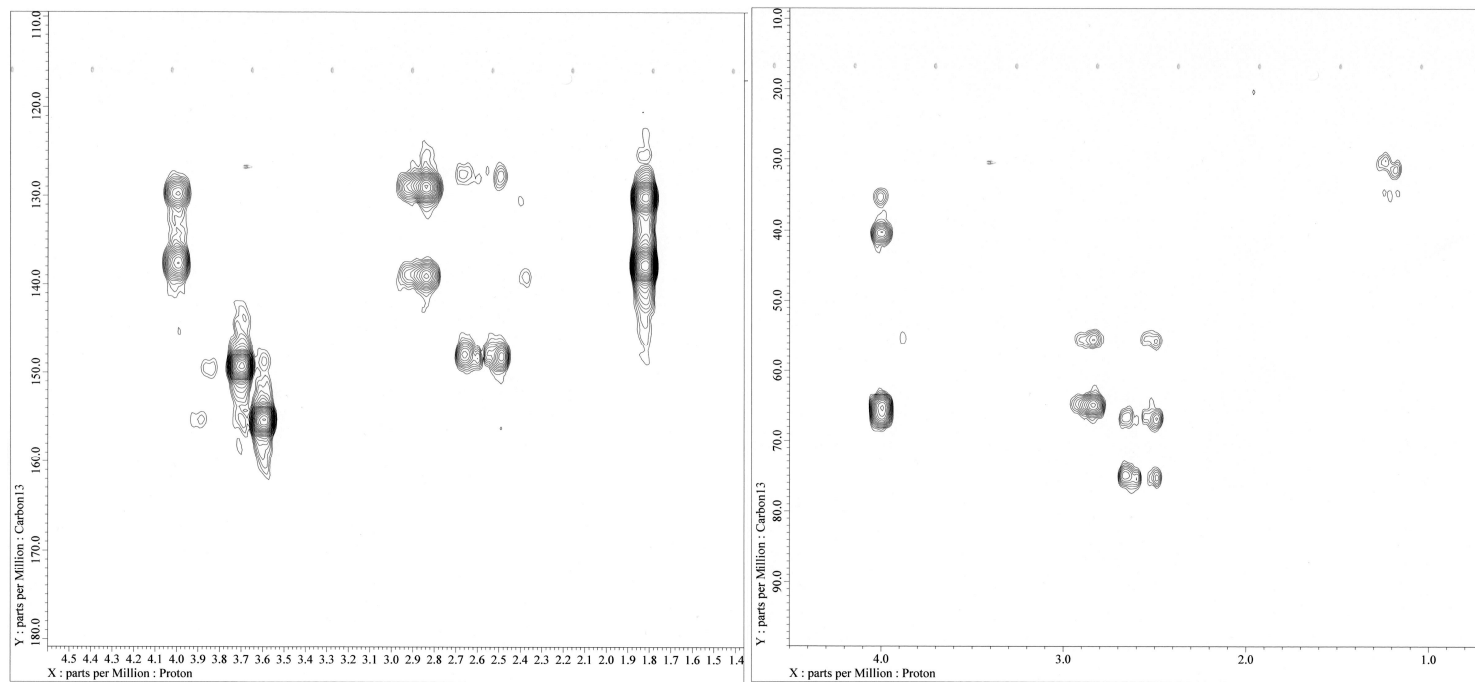

**Figure S11.** HMBC spectrum of **4b** (Expansion).

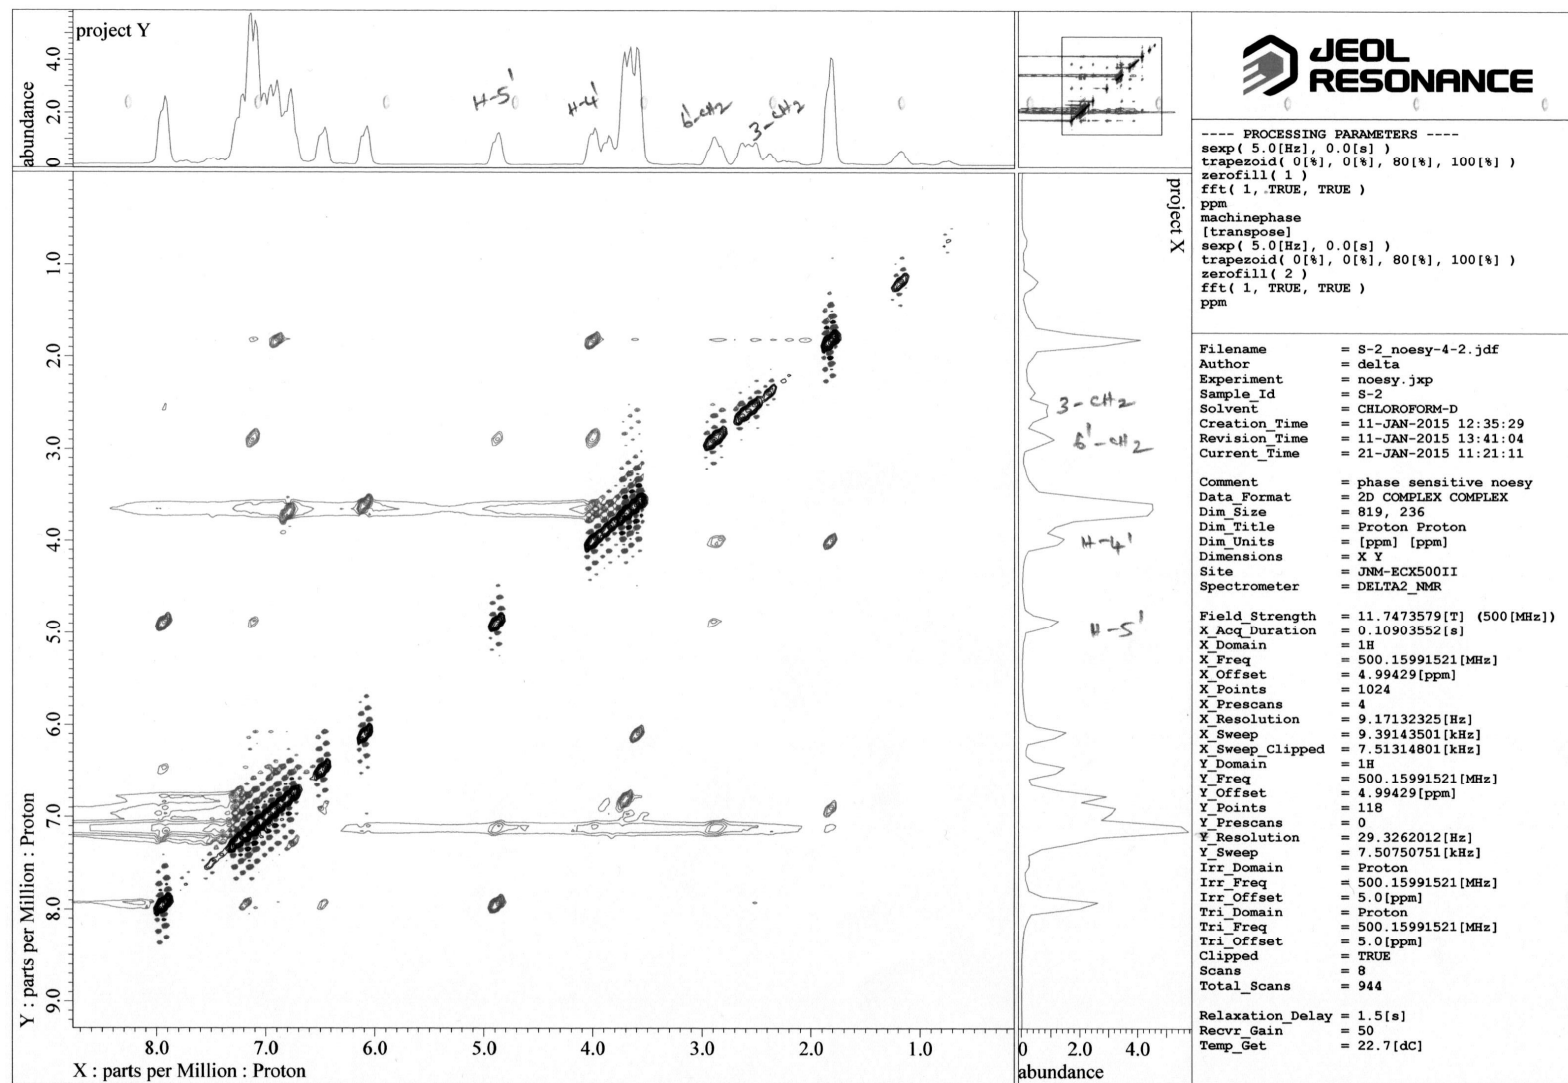

Figure S12. NOESY spectrum of 4b.

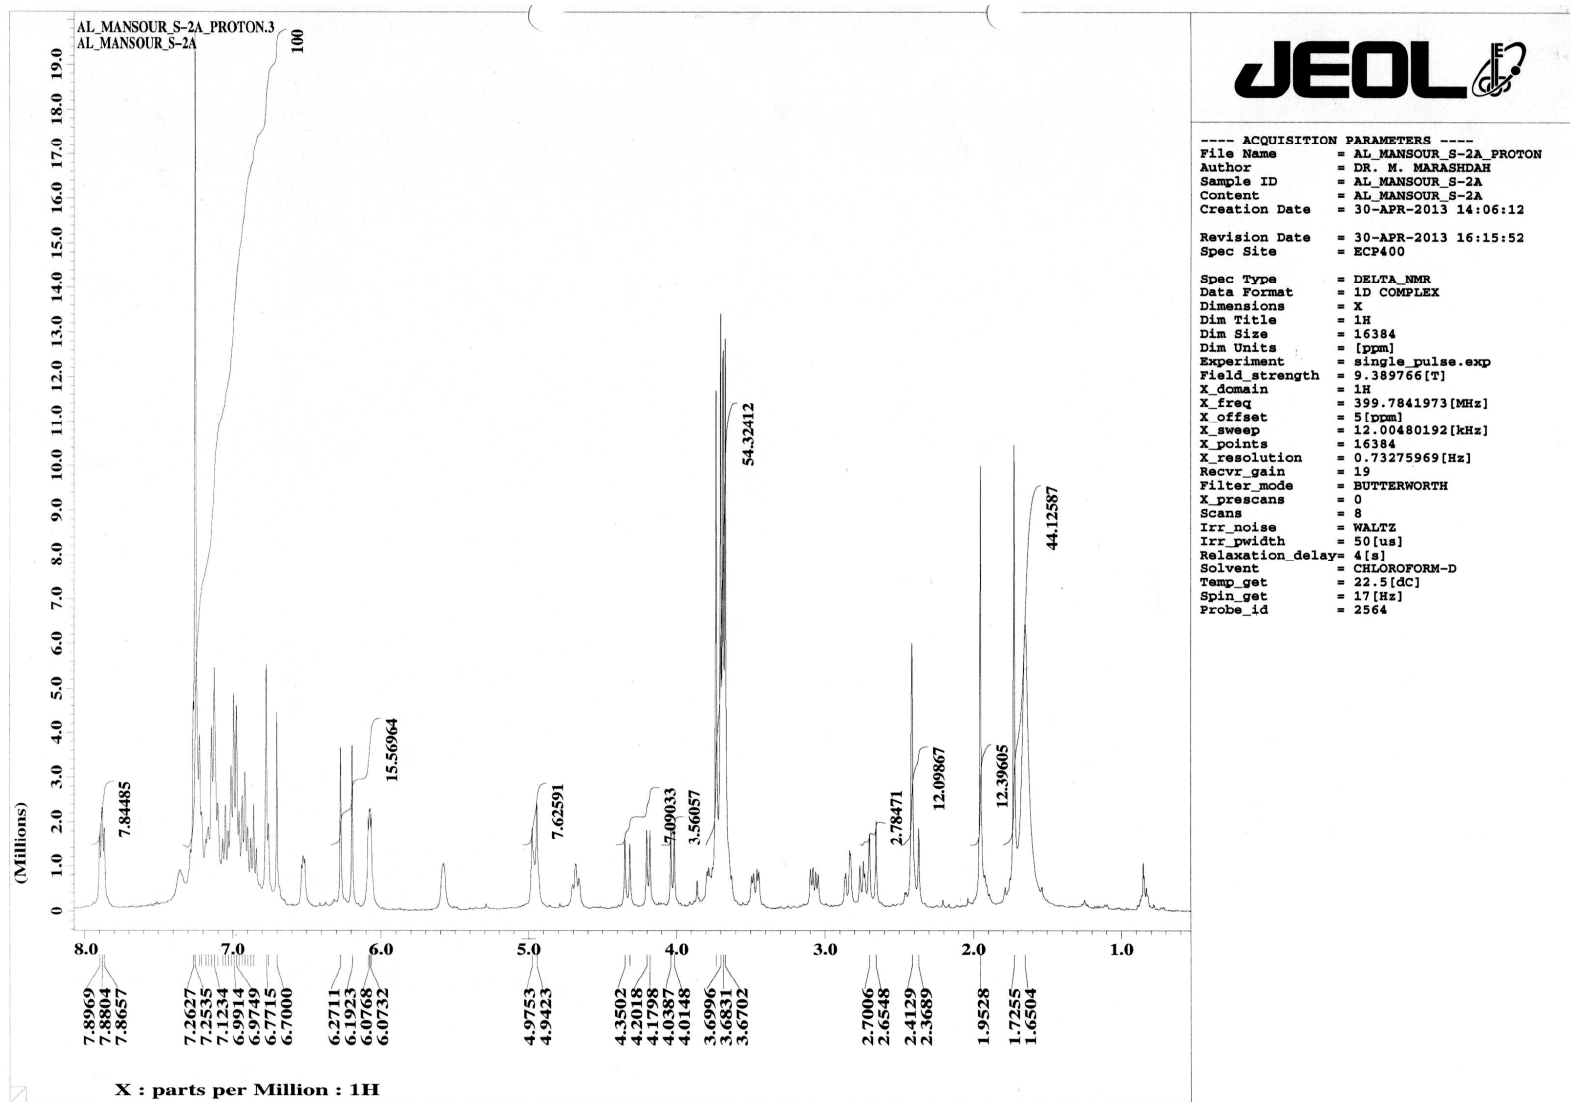Figure S13.  $^1\text{H}$ -NMR spectrum of **6b**.

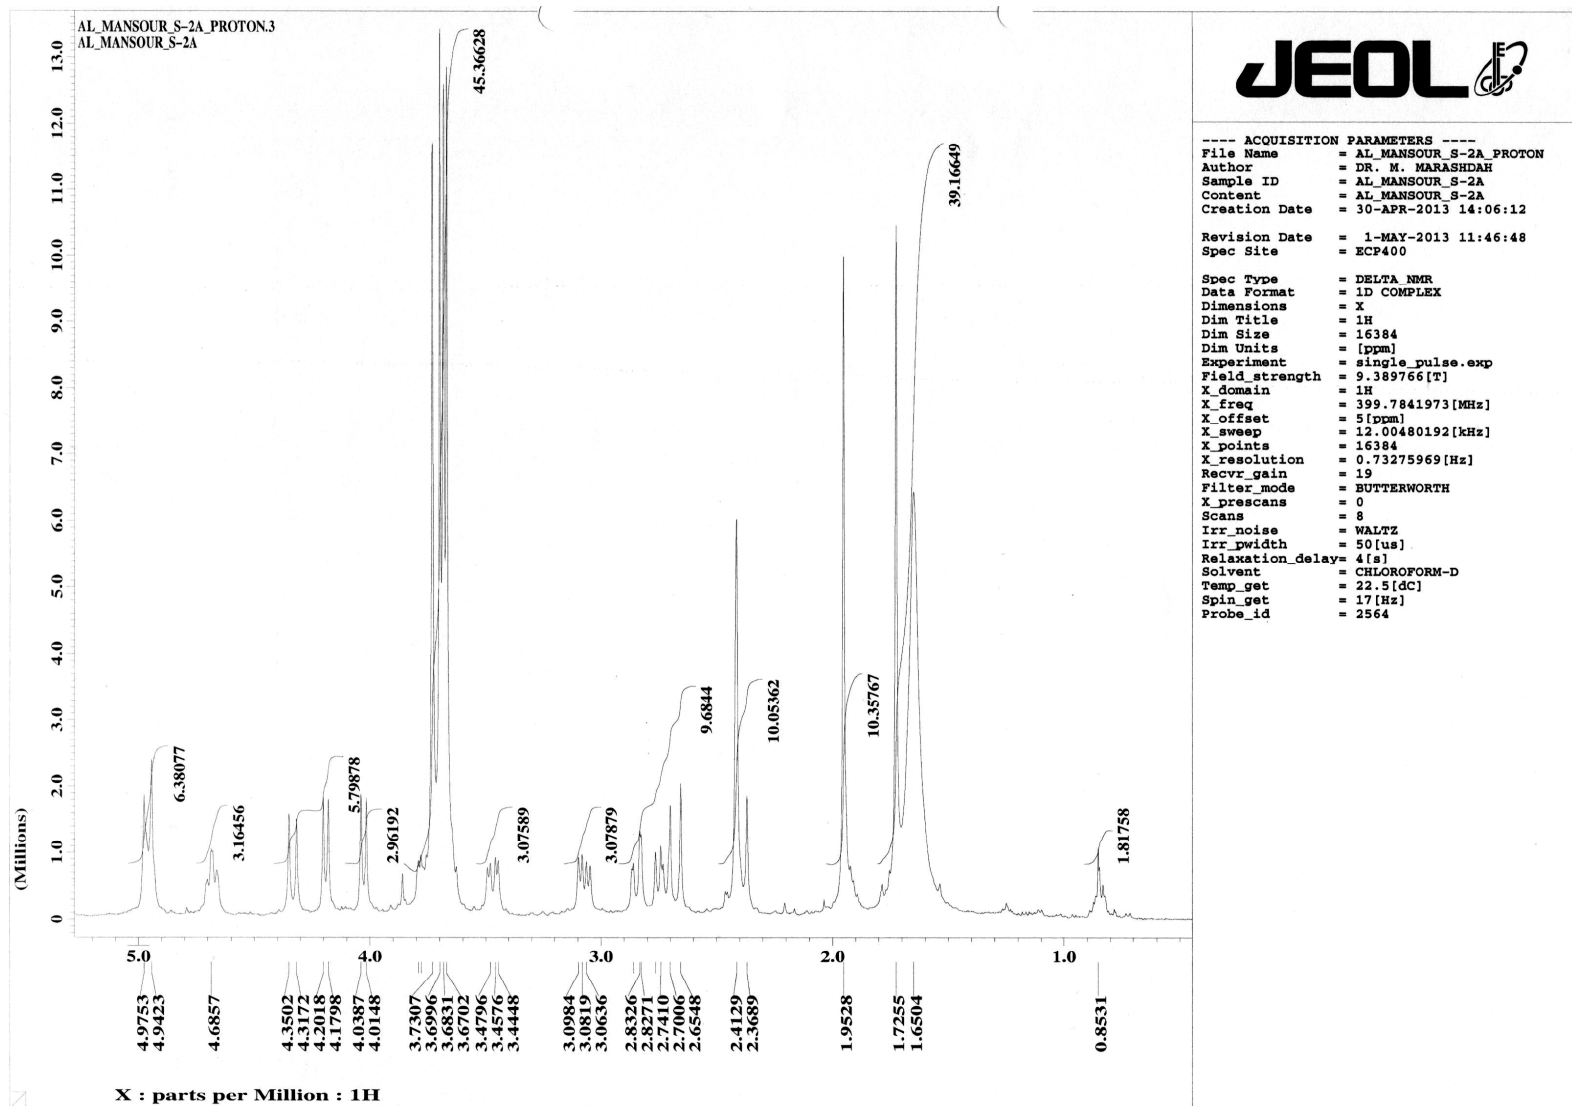Figure S14.  $^1\text{H}$ -NMR spectrum of **6b** (Expansion).

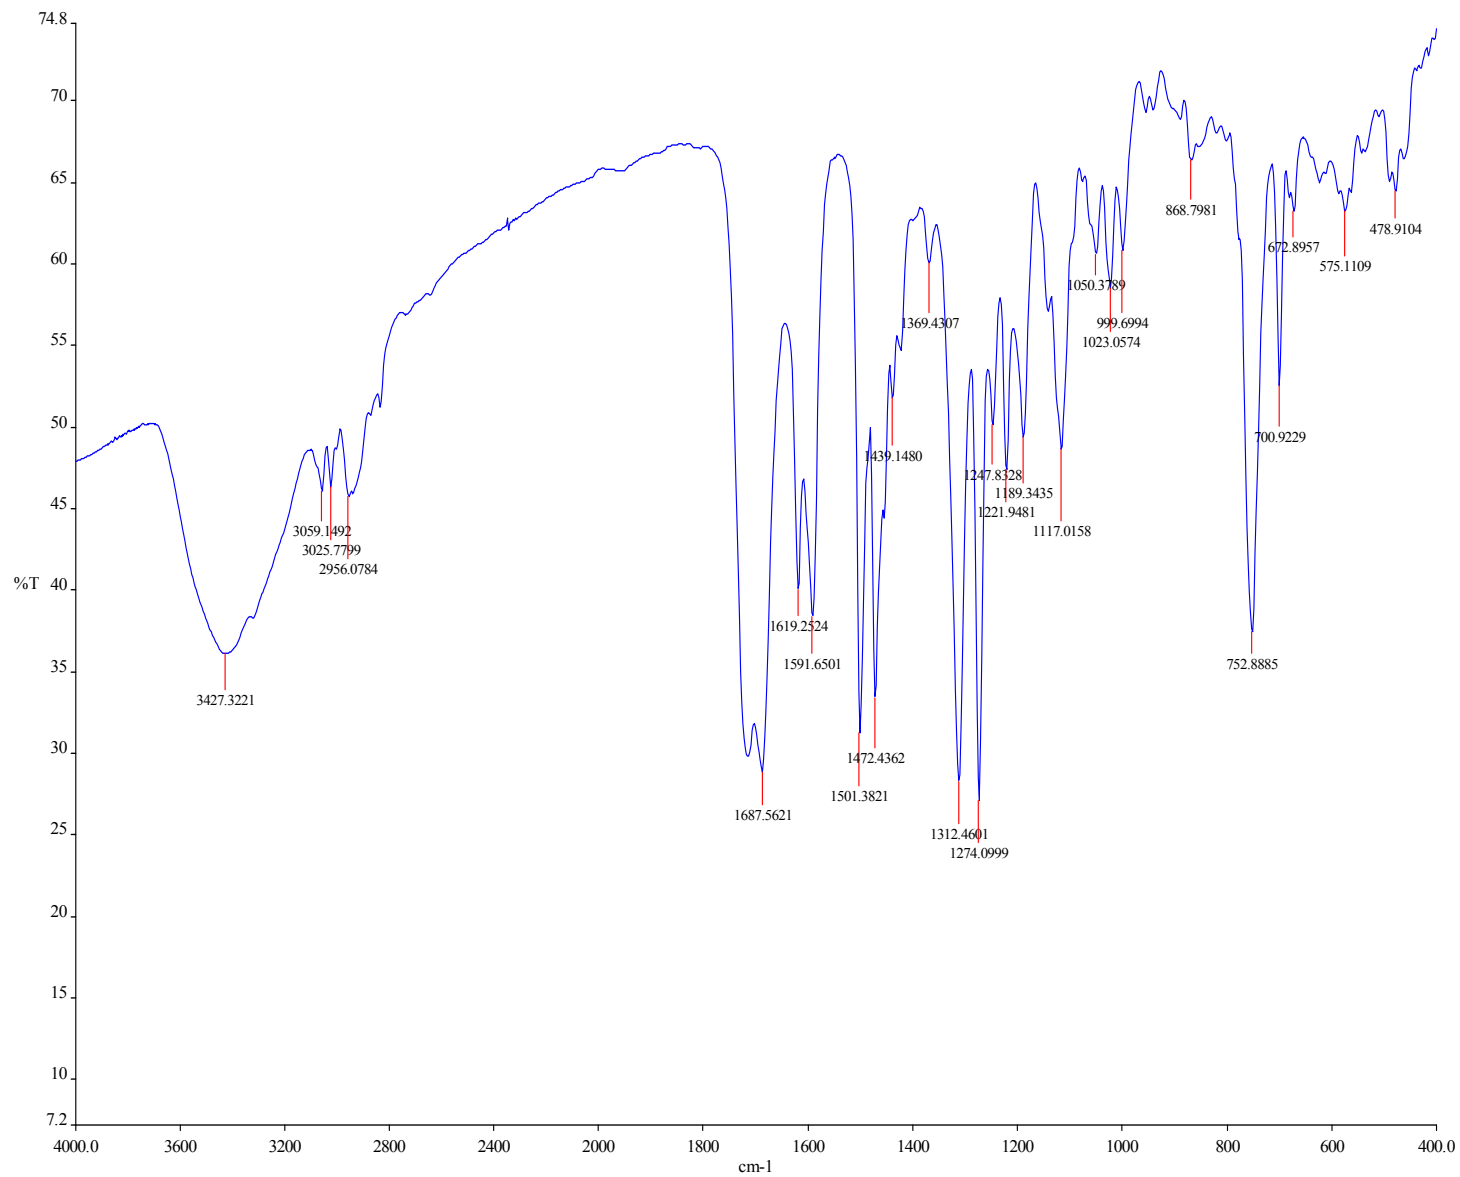

Figure S15. FT-IR spectrum of 4b.
